# Supplementary material
Source: ML conference proceedings conference paper supplement (https://openreview.net/forum?id=XY6BnwIh4q)
Supplement: supplementary_material [file attachment]

---

# Binary Radiance Fields

## *Supplement*

---

### A Experimental Setting of Baselines

We have followed the experimental setting of the configurations released in the official code with minor modifications. We use reported scores in the original paper for Re:NeRF [1] and VQRF [2].

**DVGO** DVGO [3, 4] consists of coarse and fine grids of density and features with a shallow MLP for color prediction. We set the number of voxels in the coarse grids to  $100^3$  and in the fine grids to  $160^3$  for both the density and feature grids. The dimension of features stored in each voxel of the coarse and fine density grid is 1, while in the coarse and fine feature grid, it is 3 and 12, respectively. The shallow MLP has two 128-channel hidden layers with ReLU activation.

**Plenoxels** Plenoxels [5] consists of sparse voxel grids having density values and spherical harmonics coefficients. We set the number of voxels from  $256^3$  to  $512^3$  during training. The dimension of features for density voxel is 1, and for spherical harmonics, the number of coefficients is 27 since we use spherical harmonics of degree 3.

**TensorRF** TensorRF-VM [6] consists of vector and matrix components with a shallow MLP for color prediction. We set the number of voxels from  $128^3$  to  $300^3$  during training. The dimension of features in each cell of vector and matrix components is 48 for density and 144 for color. Similarly, TensorRF-CP [6] consists of only vector components with a shallow MLP for color prediction. We also set the number of voxels from  $128^3$  to  $300^3$  during training. The dimension of features in each cell of vector components is 96 for density and 288 for color. The shallow MLP has two 128-channel hidden layers with ReLU activation.

**CCNeRF** CCNeRF-HY [7] uses a hybrid representation that combines CANDECOMP/PARAFAC (CP) decomposition and Triple Plane (TP) decomposition. We set the number of voxels from  $128^3$  to  $300^3$  during training. CCNeRF-HY has 96 vector components for expressing density, and it has 96 vector components and 64 matrix components for expressing color. Due to the rank-residual learning strategy, we can efficiently reduce the model size by adopting rank truncation that excludes the matrix components for color. Since this model contains only vector components for CP decomposition, we denote this truncated CCNeRF-HY model as CCNeRF-CP in this paper. Note that it differs from the experimental setting of CCNeRF-CP in the original paper, which exclusively employs vector components for optimization like TensorRF-CP.

**Instant-NGP** Instant-NGP [8] consists of a multi-resolution hash grid with two shallow MLPs each for density and color prediction. We set the 16 resolutions of the feature grid from 16 to 2048, the size of hash table  $2^{19}$ , and the feature dimension 2. The density MLP has one 64-channel hidden layer with ReLU activation, and the color MLP has two 64-channel hidden layers with ReLU activation.

**K-Planes** K-Planes [9] consists of multi-resolution planes with resolutions of 128, 256, and 512. Each cell in the planes has a 32-dim feature. K-Planes-hybrid model decodes the features using two shallow MLPs, similar to Instant-NGP [8]. The density MLP has one 64-channel hidden layer with ReLU activation, and the color MLP has two 64-channel hidden layers with ReLU activation. In the K-Planes-explicit model, the features are decoded using an explicit linear decoder.

**NeRF** NeRF [10] consists of a coarse implicit network and a fine implicit network. Each network has eight 256-channel hidden layers with ReLU activation, one additional 256-channel layer with ReLU activation, and one 128-channel layer with ReLU activation.

**Mip-NeRF** Mip-NeRF [11] consists of an implicit network. The network has eight 256-channel hidden layers with shifted Softplus activation, one additional 256-channel layer with shifted Softplus activation, and one 128-channel layer with shifted Softplus activation.

## B Additional Results

### B.1 Quantitative Results

Table 1 summarizes the average scores of quantitative results on the Synthetic-NeRF, Synthetic-NSVF, and Tanks and Temples datasets. Our model successfully outperforms data-structure- and compression-based models for all datasets with highly compact storage sizes. We provide scores of DWT-TensoRF [12] on the Tanks and Temples dataset reported in the original paper since several scenes require large memory of more than 48 GB. The failure of *Lifestyle* scene causes the noticeably worse performance of K-Planes [9] on the Synthetic-NSVF dataset; see Table. 8 & 9.

Table 1: Quantitative results of model size and reconstruction quality on the Synthetic-NeRF dataset, Synthetic-NSVF dataset, and Tanks and Temples dataset. We divide the baselines into data-structure-based models (upper rows) and compression-based (middle rows) models.  $\dagger$  denotes that we provide scores reported in the original paper. We denote our small model as Ours-S and our base model as Ours-B. All our models are scaled by the feature dimension  $F$ ; for instance, Ours-B2 denotes a base variant with feature dimension  $F = 2$ . We highlight the **best score** and **second-best score**.

| Method                           | Synthetic-NeRF |       |       | Synthetic-NSVF |       |       | Tanks and Temples |       |       |
|----------------------------------|----------------|-------|-------|----------------|-------|-------|-------------------|-------|-------|
|                                  | Size↓<br>(MB)  | PSNR↑ | SSIM↑ | Size↓<br>(MB)  | PSNR↑ | SSIM↑ | Size↓<br>(MB)     | PSNR↑ | SSIM↑ |
| DVGO [3, 4]                      | 655.3          | 31.96 | 0.956 | 653.7          | 35.01 | 0.975 | 652.8             | 28.36 | 0.911 |
| Plenoxels [5]                    | 778.2          | 31.72 | 0.958 | 803.6          | 34.15 | 0.978 | 892.8             | 26.87 | 0.912 |
| TensoRF-CP [6]                   | 3.9            | 31.66 | 0.950 | 4.1            | 34.57 | 0.971 | 4.0               | 27.93 | 0.901 |
| TensoRF-VM [6]                   | 72.4           | 33.24 | 0.963 | 71.6           | 36.73 | 0.982 | 72.5              | 28.65 | 0.922 |
| CCNeRF-CP [7]                    | 1.5            | 29.30 | 0.937 | 1.6            | 31.99 | 0.950 | 1.6               | 26.25 | 0.873 |
| CCNeRF-HY [7]                    | 72.1           | 31.22 | 0.947 | 71.7           | 34.57 | 0.974 | 73.7              | 27.62 | 0.901 |
| Instant-NGP [8]                  | 24.6           | 32.66 | 0.958 | 24.6           | 33.01 | 0.973 | 24.5              | 27.72 | 0.926 |
| K-Planes-explicit [9]            | 384.7          | 32.19 | 0.960 | 383.9          | 31.20 | 0.952 | 383.9             | 28.01 | 0.921 |
| K-Planes-hybrid [9]              | 383.9          | 32.31 | 0.961 | 383.9          | 31.18 | 0.951 | 384.7             | 28.01 | 0.921 |
| Re:DVGO-High $^\dagger$ [1]      | 2.0            | 31.08 | 0.944 | 2.5            | 34.90 | 0.969 | 1.6               | 27.90 | 0.894 |
| Re:Plenoxels-High $^\dagger$ [1] | 54.7           | 30.97 | 0.944 | -              | -     | -     | 85.5              | 27.34 | 0.896 |
| Re:TensoRF-High $^\dagger$ [1]   | 7.9            | 32.81 | 0.956 | 8.5            | 36.14 | 0.978 | 6.7               | 28.24 | 0.907 |
| VQ-DVGO $^\dagger$ [2]           | 1.4            | 31.77 | 0.954 | 1.3            | 34.72 | 0.974 | 1.4               | 28.26 | 0.909 |
| VQ-Plenoxels $^\dagger$ [2]      | 13.7           | 31.53 | 0.956 | 11.9           | 33.91 | 0.976 | 14.3              | 26.73 | 0.908 |
| VQ-TensoRF $^\dagger$ [2]        | 3.6            | 32.86 | 0.960 | 4.1            | 36.16 | 0.980 | 3.3               | 28.20 | 0.913 |
| DWT-TensoRF-S [12]               | 0.9            | 31.80 | 0.953 | 0.9            | 34.60 | 0.972 | 0.9               | 27.77 | -     |
| DWT-TensoRF-M [12]               | 1.2            | 31.91 | 0.954 | 1.3            | 34.88 | 0.974 | 1.3               | 27.83 | -     |
| DWT-TensoRF-L [12]               | 1.7            | 32.05 | 0.955 | 2.0            | 35.02 | 0.975 | 1.9               | 27.92 | -     |
| NeRF [10]                        | 4.6            | 31.69 | 0.951 | 4.6            | 34.46 | 0.967 | 4.6               | 27.58 | 0.902 |
| Mip-NeRF [11]                    | 2.3            | 32.20 | 0.960 | 2.3            | 35.33 | 0.971 | 2.3               | 27.77 | 0.901 |
| Ours-S2                          | 0.5            | 32.03 | 0.954 | 0.5            | 34.48 | 0.972 | 0.5               | 28.20 | 0.910 |
| Ours-S4                          | 0.9            | 32.99 | 0.960 | 0.9            | 35.59 | 0.978 | 1.0               | 28.44 | 0.914 |
| Ours-S8                          | 1.7            | 33.46 | 0.963 | 1.8            | 36.28 | 0.981 | 1.9               | 28.61 | 0.920 |
| Ours-B2                          | 1.4            | 32.64 | 0.958 | 1.5            | 35.70 | 0.978 | 1.6               | 28.49 | 0.917 |
| Ours-B4                          | 2.8            | 33.26 | 0.962 | 2.9            | 36.58 | 0.982 | 3.1               | 28.68 | 0.922 |
| Ours-B8                          | 5.8            | 33.59 | 0.964 | 5.9            | 37.09 | 0.984 | 6.0               | 28.72 | 0.925 |

### B.2 Training Time

We also evaluate the training time for each method. Fig. 1 shows that our method has a comparable convergence speed to SOTA fast radiance field models.

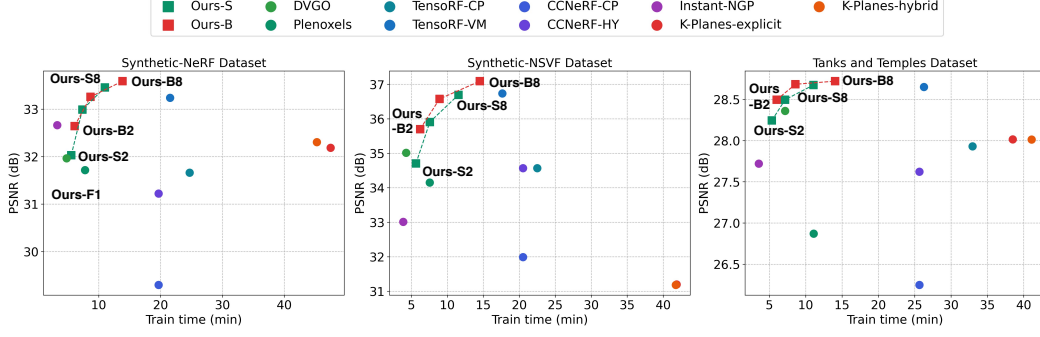

Figure 1: Illustration of the training time and reconstruction quality (PSNR) of each method on the Synthetic-NeRF dataset, Synthetic-NSVF dataset, and Tanks and Temples dataset.

### B.3 Inference Speed

Additionally, we compare the inference speed of our model with baselines. Fig. 2 demonstrates that our method has a comparable rendering speed to SOTA fast radiance field models.

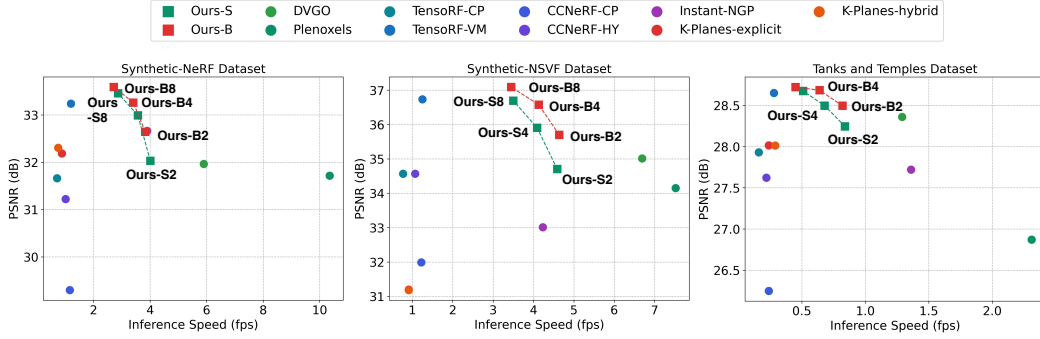

Figure 2: Illustration of the inference speed (fps) and reconstruction quality (PSNR) of each method on the Synthetic-NeRF dataset, Synthetic-NSVF dataset, and Tanks and Temples dataset.

### B.4 Ablation Study

**Feature grid design** Table 2 shows the scores of the ablation study on the feature grid design. With a similar number of parameters, our 2D-3D hybrid feature grid design has superior performance on various datasets compared to tri-plane and voxel representation.

Table 2: Ablation study on the feature grid design. The experiments are conducted on the Synthetic-NeRF dataset, Synthetic-NSVF dataset, and Tanks and Temples dataset.

| Design              | # Params | Synthetic-NeRF |              | Synthetic-NSVF |              | Tanks and Temples |              |
|---------------------|----------|----------------|--------------|----------------|--------------|-------------------|--------------|
|                     |          | PSNR↑          | SSIM↑        | PSNR↑          | SSIM↑        | PSNR↑             | SSIM↑        |
| Tri-plane (only 2D) | 13.7 M   | 31.44          | 0.949        | 34.33          | 0.971        | 27.97             | 0.904        |
| Voxel (only 3D)     | 13.6 M   | 32.35          | 0.956        | 35.10          | 0.975        | 28.35             | 0.912        |
| Hybrid (2D + 3D)    | 13.2 M   | <b>32.64</b>   | <b>0.958</b> | <b>35.70</b>   | <b>0.978</b> | <b>28.49</b>      | <b>0.917</b> |

**Hash table size** Table 3 reports the scores of the ablation study on the hash table size. We can further reduce the storage size of our model by using a smaller size of the hash table, but it might lead to a decline in the reconstruction quality. Also, we can achieve higher performance by increasing the hash table size, leading to a larger storage size. In this work, we use  $\{2^{15}, 2^{17}\}$  and  $\{2^{17}, 2^{19}\}$  size of hash tables as our small and base configuration, respectively.

Table 3: Ablation study on the hash table size. The experiments are conducted on the Synthetic-NeRF dataset.

| $\{T_{2D}, T_{3D}\}$ | $F = 1$    |       | $F = 2$    |       | $F = 4$    |       | $F = 8$    |       |
|----------------------|------------|-------|------------|-------|------------|-------|------------|-------|
|                      | Size (MB)↓ | PSNR↑ |
| $\{2^{13}, 2^{15}\}$ | 0.12       | 29.20 | 0.18       | 30.66 | 0.31       | 32.00 | 0.58       | 32.90 |
| $\{2^{15}, 2^{17}\}$ | 0.27       | 30.66 | 0.46       | 32.03 | 0.87       | 32.99 | 1.73       | 33.46 |
| $\{2^{17}, 2^{19}\}$ | 0.72       | 31.53 | 1.41       | 32.64 | 2.83       | 33.26 | 5.76       | 33.59 |
| $\{2^{19}, 2^{21}\}$ | 1.94       | 31.61 | 3.99       | 32.71 | 7.84       | 33.20 | 16.61      | 33.52 |
| $\{2^{21}, 2^{23}\}$ | 7.05       | 31.93 | 14.70      | 32.89 | 29.65      | 33.31 | 61.35      | 33.55 |

## B.5 Dynamic Scene Reconstruction

Table 4 and 5 present full scores and Fig. 3 and 4 show the qualitative results of the dynamic scene reconstruction. We apply binary feature encoding to TiNeuVox [13] and compare our model with the original model.

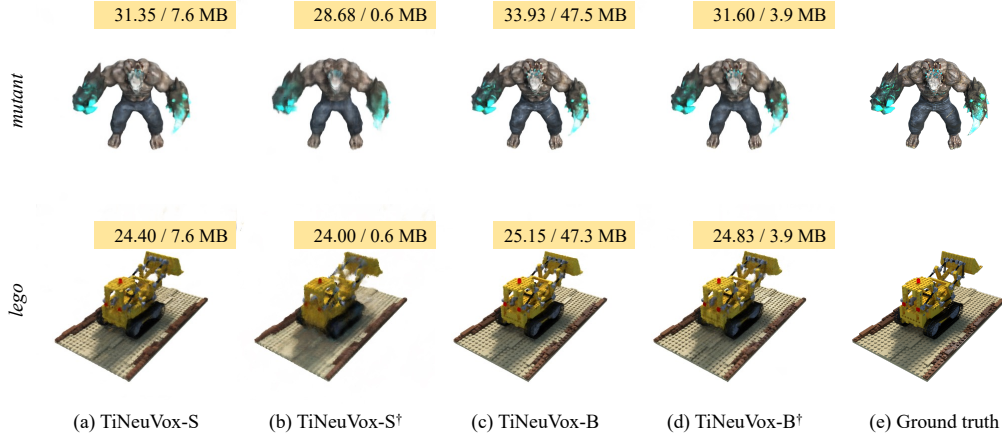

Figure 3: Qualitative results on each scene of the D-NeRF dataset. † denotes that binary feature encoding is applied. PSNR and storage size are shown on the upper right side in each subfigure.

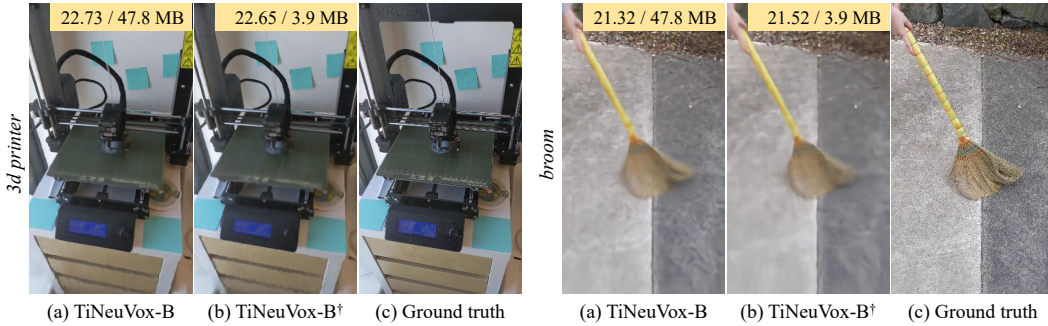

Figure 4: Qualitative results on each scene of the HyperNeRF dataset. † denotes that binary feature encoding is applied. PSNR and storage size are shown on the upper right side in each subfigure.

## B.6 Qualitative Results

Fig. 5, 6, and 7 demonstrate the qualitative results on each scene of the Synthetic-NeRF dataset, Synthetic-NSVF dataset, and Tanks and Temples dataset, respectively. We report the rendering images of our method with the cropped area.

Table 4: Quantitative results of storage size and reconstruction quality (PSNR, SSIM, LPIPS) on each scene of the D-NeRF dataset. † denotes that binary feature encoding is applied.

| Method      | <i>bouncingballs</i> | <i>hellwarrior</i> | <i>hook</i> | <i>jumpingjacks</i> | <i>lego</i> | <i>mutant</i> | <i>standup</i> | <i>trex</i> | Avg.  |
|-------------|----------------------|--------------------|-------------|---------------------|-------------|---------------|----------------|-------------|-------|
| PSNR↑       |                      |                    |             |                     |             |               |                |             |       |
| TiNeuVox-S  | 39.34                | 27.07              | 29.60       | 32.95               | 24.40       | 31.35         | 33.50          | 30.04       | 31.03 |
| TiNeuVox-S† | 36.26                | 24.54              | 26.87       | 30.08               | 24.00       | 28.68         | 30.36          | 28.62       | 28.68 |
| TiNeuVox-B  | 41.09                | 28.27              | 31.86       | 34.80               | 25.15       | 33.93         | 36.12          | 32.97       | 33.02 |
| TiNeuVox-B† | 39.18                | 26.86              | 29.47       | 33.24               | 24.83       | 31.60         | 33.79          | 30.86       | 31.23 |
| SSIM↑       |                      |                    |             |                     |             |               |                |             |       |
| TiNeuVox-S  | 0.988                | 0.954              | 0.954       | 0.975               | 0.886       | 0.961         | 0.977          | 0.958       | 0.957 |
| TiNeuVox-S† | 0.981                | 0.935              | 0.928       | 0.960               | 0.853       | 0.942         | 0.963          | 0.946       | 0.938 |
| TiNeuVox-B  | 0.992                | 0.965              | 0.972       | 0.983               | 0.921       | 0.977         | 0.986          | 0.979       | 0.972 |
| TiNeuVox-B† | 0.989                | 0.955              | 0.954       | 0.976               | 0.906       | 0.964         | 0.978          | 0.964       | 0.961 |
| LPIPS↓      |                      |                    |             |                     |             |               |                |             |       |
| TiNeuVox-S  | 0.054                | 0.080              | 0.068       | 0.042               | 0.117       | 0.049         | 0.030          | 0.059       | 0.062 |
| TiNeuVox-S† | 0.092                | 0.114              | 0.097       | 0.068               | 0.164       | 0.069         | 0.052          | 0.076       | 0.091 |
| TiNeuVox-B  | 0.040                | 0.066              | 0.045       | 0.033               | 0.070       | 0.030         | 0.020          | 0.031       | 0.042 |
| TiNeuVox-B† | 0.054                | 0.084              | 0.071       | 0.046               | 0.098       | 0.047         | 0.033          | 0.052       | 0.061 |
| Size (MB)↓  |                      |                    |             |                     |             |               |                |             |       |
| TiNeuVox-S  | 7.6                  | 7.6                | 7.6         | 7.6                 | 7.7         | 7.6           | 7.6            | 7.6         | 7.6   |
| TiNeuVox-S† | 0.6                  | 0.6                | 0.6         | 0.6                 | 0.6         | 0.6           | 0.6            | 0.6         | 0.6   |
| TiNeuVox-B  | 47.5                 | 47.5               | 47.5        | 47.5                | 47.3        | 47.5          | 47.5           | 47.5        | 47.5  |
| TiNeuVox-B† | 3.9                  | 3.9                | 3.9         | 3.9                 | 3.9         | 3.9           | 3.9            | 3.9         | 3.9   |

Table 5: Quantitative results of storage size and reconstruction quality (PSNR, MS-SSIM) on each scene of the HyperNeRF dataset. † denotes that binary feature encoding is applied.

| Method      | <i>3d printer</i> | <i>broom</i> | <i>chicken</i> | <i>peel-banana</i> | Avg.  |
|-------------|-------------------|--------------|----------------|--------------------|-------|
| PSNR↑       |                   |              |                |                    |       |
| TiNeuVox-B  | 22.73             | 21.32        | 28.28          | 24.47              | 24.20 |
| TiNeuVox-B† | 22.65             | 21.52        | 27.75          | 23.54              | 23.87 |
| MS-SSIM↑    |                   |              |                |                    |       |
| TiNeuVox-B  | 0.835             | 0.694        | 0.938          | 0.873              | 0.835 |
| TiNeuVox-B† | 0.835             | 0.694        | 0.938          | 0.836              | 0.826 |
| Size (MB)↓  |                   |              |                |                    |       |
| TiNeuVox-B  | 47.8              | 47.8         | 47.8           | 47.8               | 47.8  |
| TiNeuVox-B† | 3.9               | 3.9          | 3.9            | 3.9                | 3.9   |

## B.7 Scene-wise Results

Table 6, 7, 8, 9, 10, and 11 demonstrate the quantitative results on each scene of the Synthetic-NeRF dataset, Synthetic-NSVF dataset, and Tanks and Temples dataset, respectively. We measured the storage size of each method and evaluated the reconstruction quality (PSNR, SSIM, LPIPS) on various datasets.

## B.8 Comparison with 3D Gaussian Splatting

Recently, 3D-GS [14] has demonstrated impressive performance in 3D reconstruction with real-time rendering speed (>100 fps). Although our model also has a fast rendering speed, it does not achieve real-time levels like 3D-GS. Nevertheless, 3D-GS requires a considerable storage size (>500 MB) to represent the 3D scene; even its compact representation [15] also needs tens of megabytes (>20 MB). In contrast, our approach can represent the 3D scene within only 1 MB, while 3D-GS still requires a substantial storage size.



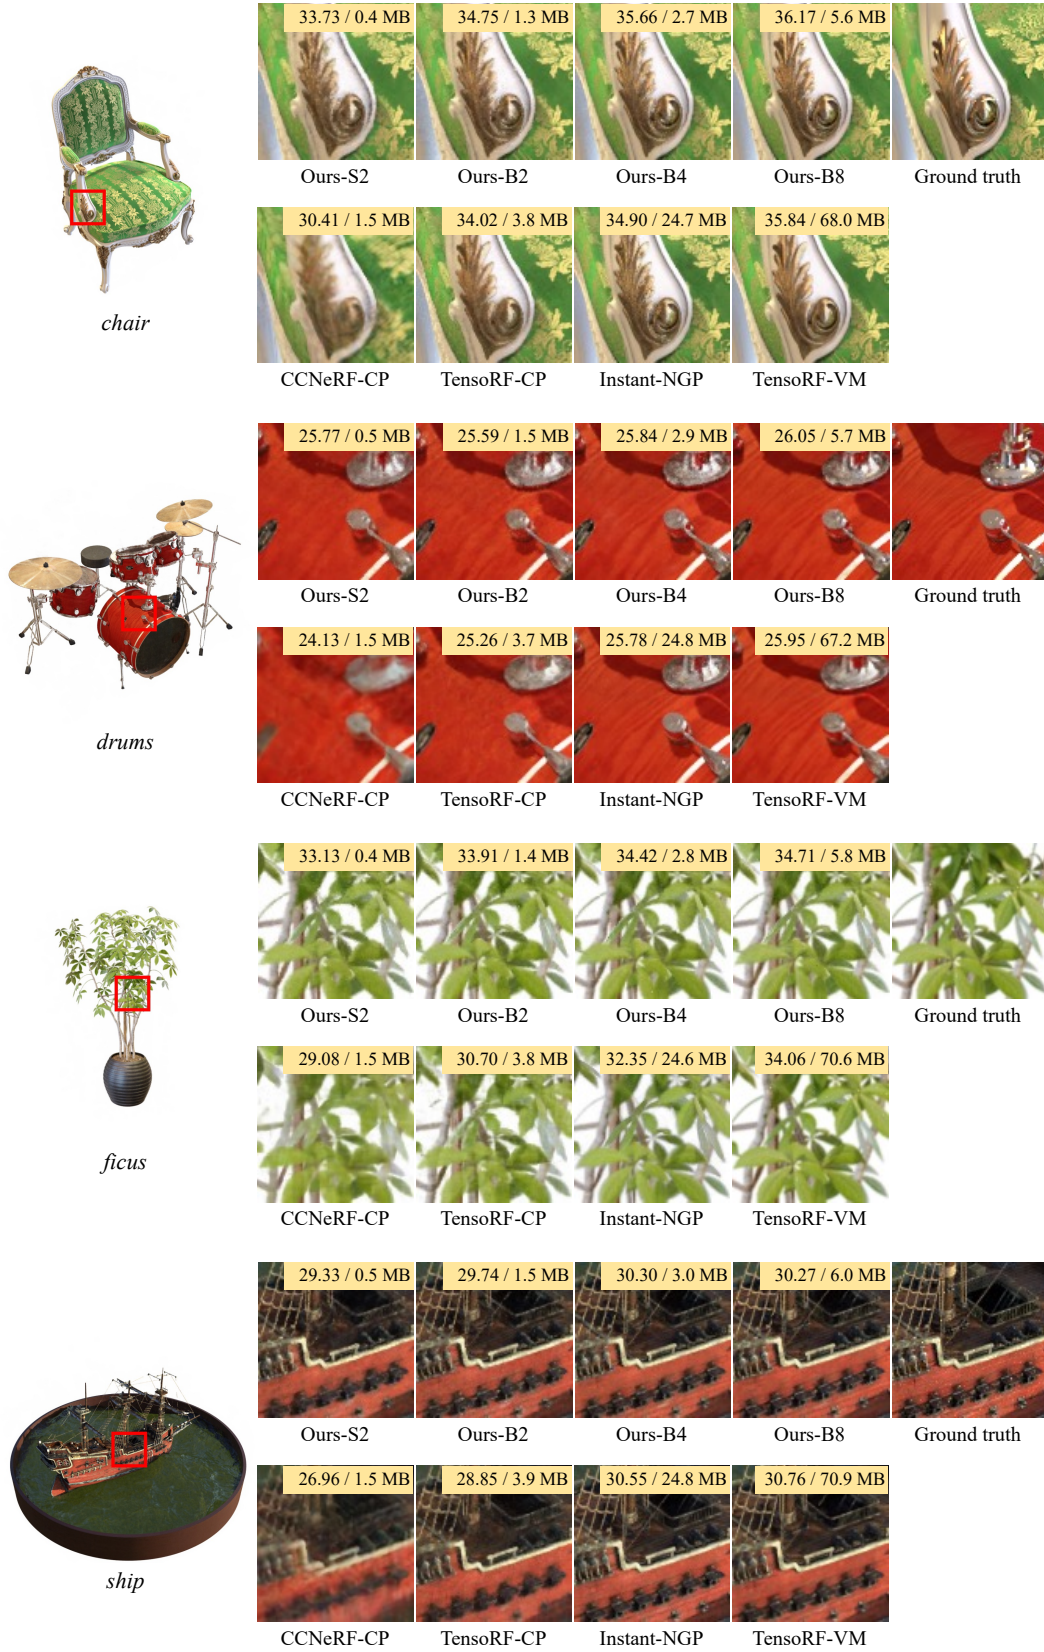

Figure 5: Qualitative results on each scene of the Synthetic-NeRF dataset. PSNR and storage size are shown on the upper right side in each subfigure.

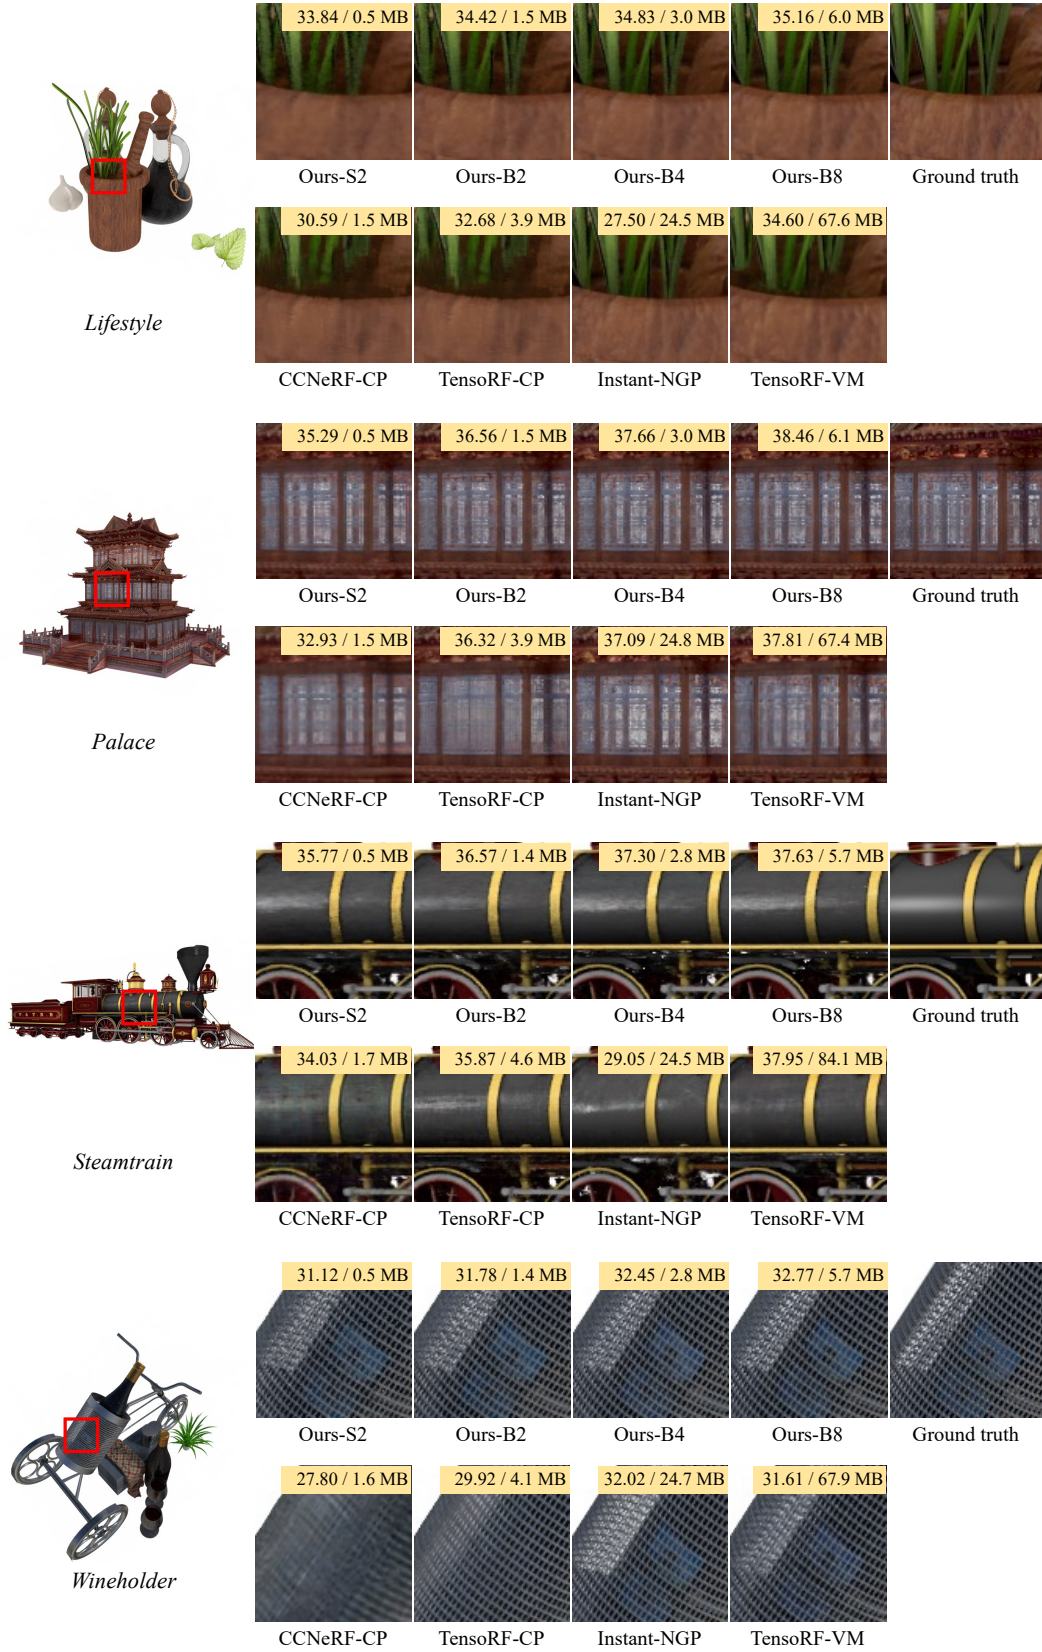

Figure 6: Qualitative results on each scene of the Synthetic-NSVF dataset. PSNR and storage size are shown on the upper right side in each subfigure.



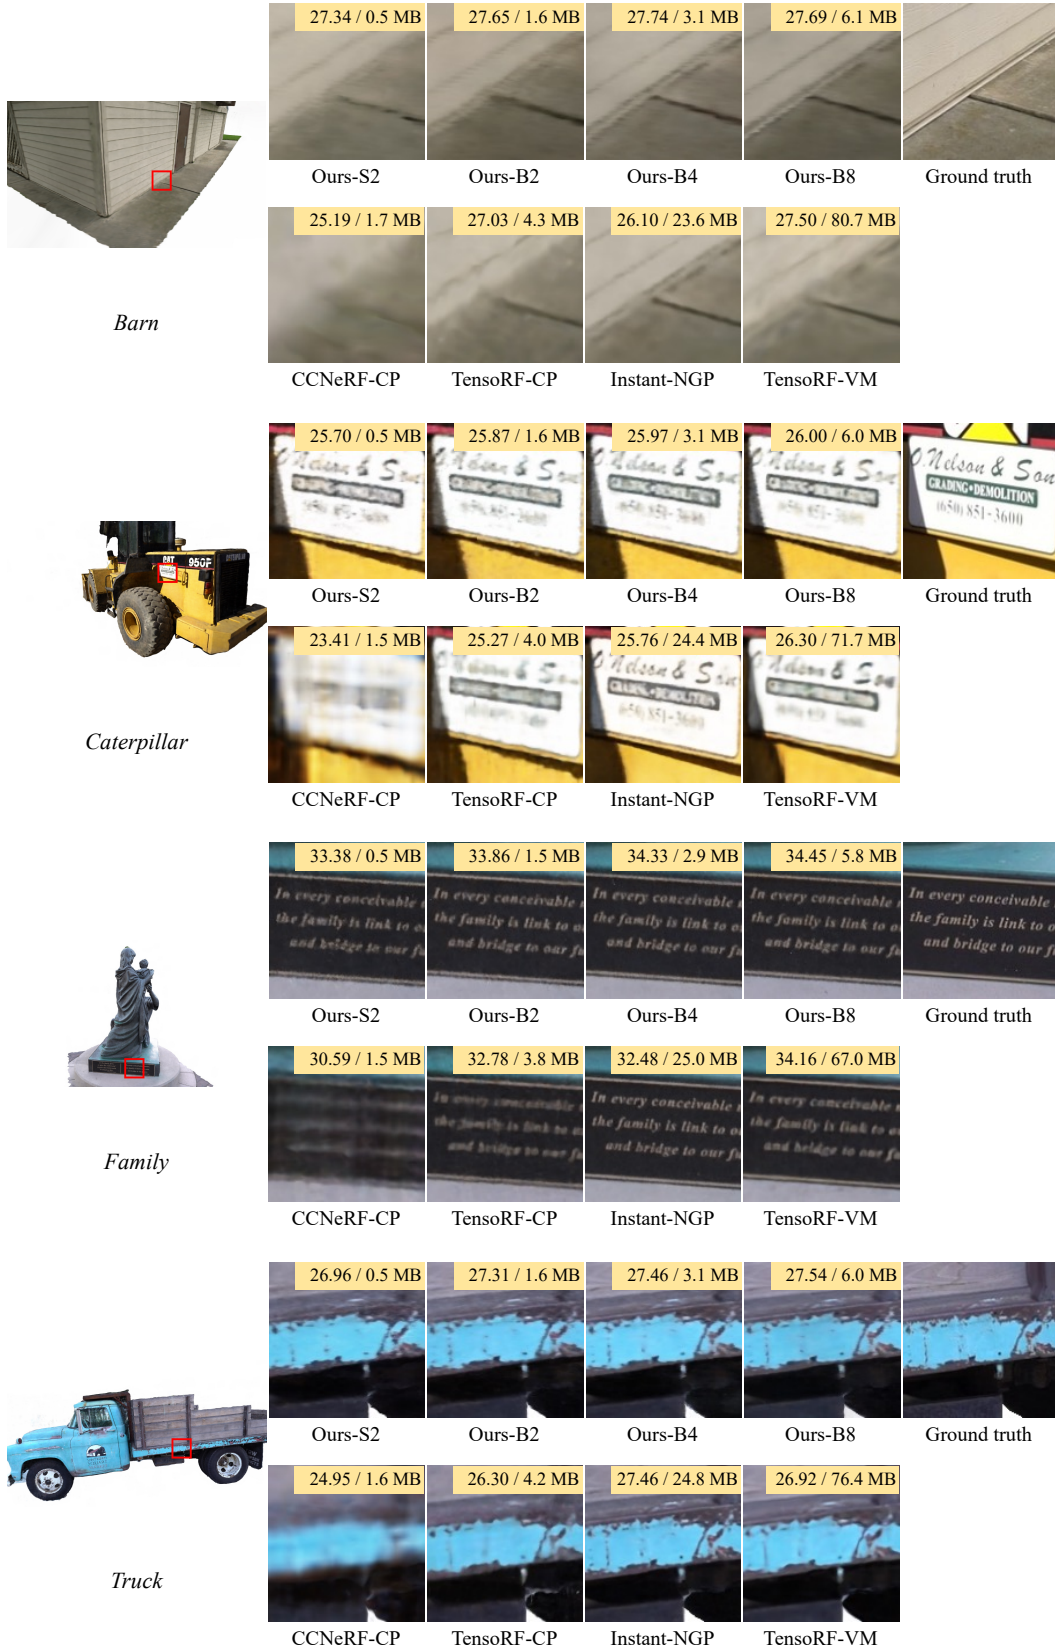

Figure 7: Qualitative results on each scene of the Tanks and Temples dataset. PSNR and storage size are shown on the upper right side in each subfigure.



Table 6: Quantitative results of storage size and reconstruction quality (PSNR) on each scene of the Synthetic-NeRF dataset. We highlight the **best score** and **second-best score**.

| Method                | <i>chair</i> | <i>drums</i> | <i>ficus</i> | <i>hotdog</i> | <i>lego</i> | <i>materials</i> | <i>mic</i> | <i>ship</i> | Avg.  |
|-----------------------|--------------|--------------|--------------|---------------|-------------|------------------|------------|-------------|-------|
| Size (MB)↓            |              |              |              |               |             |                  |            |             |       |
| DVGO [3, 4]           | 4.3          | 4.1          | 4.6          | 5.2           | 4.7         | 5.2              | 4.0        | 6.2         | 4.8   |
| Plenoxels [5]         | 7.1          | 6.9          | 6.1          | 8.5           | 8.0         | 7.5              | 5.9        | 12.3        | 7.8   |
| TensoRF-CP [6]        | 22.6         | 21.1         | 26.5         | 23.3          | 23.9        | 33.7             | 21.4       | 25.1        | 24.7  |
| TensoRF-VM [6]        | 24.2         | 13.4         | 25.8         | 18.0          | 25.4        | 22.8             | 23.1       | 19.6        | 21.5  |
| CCNeRF-CP [7]         | 18.3         | 17.5         | 20.3         | 19.9          | 18.9        | 23.7             | 19.0       | 19.9        | 19.7  |
| CCNeRF-HY [7]         | 18.3         | 17.5         | 20.3         | 19.9          | 18.9        | 23.7             | 19.0       | 19.9        | 19.7  |
| Instant-NGP [8]       | 3.6          | 3.1          | 2.8          | 3.5           | 3.7         | 2.9              | 3.3        | 3.2         | 3.3   |
| K-Planes-explicit [9] | 47.2         | 48.0         | 48.0         | 46.8          | 47.0        | 47.9             | 47.7       | 47.4        | 47.5  |
| K-Planes-hybrid [9]   | 45.5         | 45.6         | 45.9         | 44.3          | 44.3        | 45.9             | 45.4       | 45.4        | 45.3  |
| NeRF [10]             | 4.6          | 4.6          | 4.6          | 4.6           | 4.6         | 4.6              | 4.6        | 4.6         | 4.6   |
| Mip-NeRF [11]         | 2.3          | 2.3          | 2.3          | 2.3           | 2.3         | 2.3              | 2.3        | 2.3         | 2.3   |
| Ours-S2               | 0.4          | 0.5          | 0.4          | 0.5           | 0.5         | 0.5              | 0.4        | 0.5         | 0.5   |
| Ours-S4               | 0.8          | 0.9          | 0.8          | 0.9           | 0.9         | 0.9              | 0.8        | 1.0         | 0.9   |
| Ours-S8               | 1.7          | 1.7          | 1.7          | 1.8           | 1.8         | 1.8              | 1.6        | 1.8         | 1.7   |
| Ours-B2               | 1.3          | 1.5          | 1.4          | 1.4           | 1.4         | 1.4              | 1.3        | 1.5         | 1.4   |
| Ours-B4               | 2.7          | 2.9          | 2.8          | 2.8           | 2.8         | 2.8              | 2.7        | 3.0         | 2.8   |
| Ours-B8               | 5.6          | 5.7          | 5.8          | 5.8           | 5.8         | 5.7              | 5.6        | 6.0         | 5.8   |
| PSNR↑                 |              |              |              |               |             |                  |            |             |       |
| DVGO [3, 4]           | 34.26        | 25.45        | 32.60        | 36.78         | 34.75       | 29.58            | 33.22      | 29.07       | 31.96 |
| Plenoxels [5]         | 34.00        | 25.36        | 31.83        | 36.43         | 34.11       | 29.13            | 33.23      | 29.63       | 31.72 |
| TensoRF-CP [6]        | 34.02        | 25.26        | 30.70        | 36.25         | 34.28       | 30.13            | 33.81      | 28.85       | 31.66 |
| TensoRF-VM [6]        | 35.84        | 25.95        | 34.06        | 37.62         | 36.68       | 30.11            | 34.92      | 30.76       | 33.24 |
| CCNeRF-CP [7]         | 30.41        | 24.13        | 29.08        | 33.71         | 31.04       | 27.74            | 31.30      | 26.96       | 29.30 |
| CCNeRF-HY [7]         | 34.28        | 24.84        | 30.07        | 36.10         | 33.64       | 28.82            | 33.58      | 28.45       | 31.22 |
| Instant-NGP [8]       | 34.90        | 25.78        | 32.35        | 36.82         | 35.57       | 29.56            | 35.77      | 30.55       | 32.66 |
| K-Planes-explicit [9] | 34.85        | 25.64        | 31.20        | 36.66         | 35.21       | 29.46            | 34.02      | 30.44       | 32.19 |
| K-Planes-hybrid [9]   | 34.95        | 25.67        | 31.37        | 36.71         | 35.69       | 29.31            | 34.03      | 30.71       | 32.31 |
| NeRF [10]             | 33.73        | 25.29        | 31.26        | 36.67         | 33.40       | 29.95            | 33.91      | 29.28       | 31.69 |
| Mip-NeRF [11]         | 33.92        | 25.55        | 32.55        | 36.79         | 34.37       | 30.19            | 34.56      | 29.69       | 32.20 |
| Ours-S2               | 33.73        | 25.77        | 33.13        | 36.15         | 33.91       | 29.15            | 35.06      | 29.33       | 32.03 |
| Ours-S4               | 35.02        | 26.07        | 34.19        | 37.03         | 35.31       | 29.69            | 36.65      | 29.95       | 32.99 |
| Ours-S8               | 35.83        | 26.27        | 34.64        | 37.30         | 36.20       | 29.93            | 37.20      | 30.29       | 33.46 |
| Ours-B2               | 34.75        | 25.59        | 33.91        | 36.59         | 35.06       | 29.49            | 36.01      | 29.74       | 32.64 |
| Ours-B4               | 35.66        | 25.84        | 34.42        | 37.13         | 36.02       | 29.80            | 36.91      | 30.30       | 33.26 |
| Ours-B8               | 36.17        | 26.05        | 34.71        | 37.51         | 36.48       | 30.09            | 37.44      | 30.27       | 33.59 |

Table 7: Quantitative results of reconstruction quality (SSIM, LPIPS) on each scene of the Synthetic-NeRF dataset. We highlight the **best score** and **second-best score**.

| Method                | <i>chair</i> | <i>drums</i> | <i>ficus</i> | <i>hotdog</i> | <i>lego</i> | <i>materials</i> | <i>mic</i> | <i>ship</i> | Avg.  |
|-----------------------|--------------|--------------|--------------|---------------|-------------|------------------|------------|-------------|-------|
| SSIM $\uparrow$       |              |              |              |               |             |                  |            |             |       |
| DVGO [3, 4]           | 0.977        | 0.930        | 0.978        | 0.980         | 0.977       | 0.950            | 0.983      | 0.878       | 0.956 |
| Plenoxels [5]         | 0.977        | 0.933        | 0.976        | 0.980         | 0.975       | 0.949            | 0.985      | 0.890       | 0.958 |
| TensoRF-CP [6]        | 0.976        | 0.922        | 0.965        | 0.975         | 0.972       | 0.950            | 0.983      | 0.856       | 0.950 |
| TensoRF-VM [6]        | 0.985        | 0.936        | 0.983        | 0.983         | 0.983       | 0.952            | 0.988      | 0.895       | 0.963 |
| CCNeRF-CP [7]         | 0.941        | 0.902        | 0.952        | 0.956         | 0.944       | 0.927            | 0.969      | 0.826       | 0.927 |
| CCNeRF-HY [7]         | 0.977        | 0.920        | 0.962        | 0.975         | 0.969       | 0.934            | 0.984      | 0.855       | 0.947 |
| Instant-NGP [8]       | 0.979        | 0.931        | 0.968        | 0.984         | 0.979       | 0.946            | 0.984      | 0.895       | 0.958 |
| K-Planes-explicit [9] | 0.981        | 0.936        | 0.974        | 0.981         | 0.979       | 0.949            | 0.988      | 0.892       | 0.960 |
| K-Planes-hybrid [9]   | 0.983        | 0.938        | 0.975        | 0.981         | 0.982       | 0.948            | 0.988      | 0.896       | 0.961 |
| NeRF [10]             | 0.972        | 0.928        | 0.970        | 0.977         | 0.965       | 0.952            | 0.984      | 0.864       | 0.951 |
| Mip-NeRF [11]         | 0.973        | 0.931        | 0.976        | 0.978         | 0.970       | 0.955            | 0.986      | 0.870       | 0.955 |
| Ours-S2               | 0.974        | 0.930        | 0.977        | 0.975         | 0.968       | 0.939            | 0.987      | 0.880       | 0.954 |
| Ours-S4               | 0.981        | 0.936        | 0.982        | 0.979         | 0.977       | 0.946            | 0.990      | 0.890       | 0.960 |
| Ours-S8               | 0.984        | 0.939        | 0.984        | 0.980         | 0.981       | 0.950            | 0.992      | 0.896       | 0.963 |
| Ours-B2               | 0.980        | 0.930        | 0.981        | 0.978         | 0.976       | 0.943            | 0.989      | 0.888       | 0.958 |
| Ours-B4               | 0.984        | 0.934        | 0.983        | 0.980         | 0.980       | 0.948            | 0.991      | 0.895       | 0.962 |
| Ours-B8               | 0.986        | 0.937        | 0.984        | 0.981         | 0.982       | 0.951            | 0.992      | 0.897       | 0.964 |
| LPIPS $\downarrow$    |              |              |              |               |             |                  |            |             |       |
| DVGO [3, 4]           | 0.026        | 0.079        | 0.025        | 0.033         | 0.026       | 0.058            | 0.017      | 0.160       | 0.053 |
| Plenoxels [5]         | 0.030        | 0.067        | 0.026        | 0.038         | 0.028       | 0.057            | 0.015      | 0.134       | 0.050 |
| TensoRF-CP [6]        | 0.041        | 0.107        | 0.059        | 0.052         | 0.036       | 0.069            | 0.033      | 0.194       | 0.074 |
| TensoRF-VM [6]        | 0.022        | 0.073        | 0.022        | 0.030         | 0.018       | 0.058            | 0.014      | 0.138       | 0.047 |
| CCNeRF-CP [7]         | 0.081        | 0.135        | 0.069        | 0.090         | 0.075       | 0.088            | 0.052      | 0.239       | 0.104 |
| CCNeRF-HY [7]         | 0.035        | 0.105        | 0.054        | 0.055         | 0.038       | 0.080            | 0.031      | 0.189       | 0.073 |
| Instant-NGP [8]       | 0.018        | 0.068        | 0.029        | 0.027         | 0.017       | 0.053            | 0.015      | 0.123       | 0.044 |
| K-Planes-explicit [9] | 0.020        | 0.057        | 0.028        | 0.027         | 0.019       | 0.051            | 0.010      | 0.132       | 0.043 |
| K-Planes-hybrid [9]   | 0.019        | 0.058        | 0.029        | 0.026         | 0.019       | 0.051            | 0.012      | 0.123       | 0.042 |
| NeRF [10]             | 0.041        | 0.087        | 0.035        | 0.044         | 0.046       | 0.060            | 0.022      | 0.184       | 0.065 |
| Mip-NeRF [11]         | 0.040        | 0.085        | 0.030        | 0.043         | 0.041       | 0.057            | 0.020      | 0.177       | 0.062 |
| Ours-S2               | 0.034        | 0.076        | 0.029        | 0.041         | 0.036       | 0.071            | 0.019      | 0.141       | 0.056 |
| Ours-S4               | 0.022        | 0.066        | 0.022        | 0.034         | 0.022       | 0.061            | 0.013      | 0.127       | 0.046 |
| Ours-S8               | 0.018        | 0.061        | 0.019        | 0.031         | 0.017       | 0.055            | 0.010      | 0.118       | 0.041 |
| Ours-B2               | 0.024        | 0.073        | 0.024        | 0.036         | 0.025       | 0.064            | 0.016      | 0.127       | 0.049 |
| Ours-B4               | 0.019        | 0.066        | 0.020        | 0.032         | 0.017       | 0.057            | 0.012      | 0.117       | 0.043 |
| Ours-B8               | 0.016        | 0.063        | 0.018        | 0.028         | 0.015       | 0.051            | 0.009      | 0.112       | 0.039 |

Table 8: Quantitative results of storage size and reconstruction quality (PSNR) on each scene of the Synthetic-NSVF dataset. We highlight the **best score** and **second-best score**.

| Method                | <i>Bike</i> | <i>Lifestyle</i> | <i>Palace</i> | <i>Robot</i> | <i>Spaceship</i> | <i>Steamtrain</i> | <i>Toad</i> | <i>Wineholder</i> | Avg.  |
|-----------------------|-------------|------------------|---------------|--------------|------------------|-------------------|-------------|-------------------|-------|
| Size (MB)↓            |             |                  |               |              |                  |                   |             |                   |       |
| DVGO [3, 4]           | 4.0         | 4.1              | 4.7           | 4.0          | 4.9              | 4.3               | 4.2         | 4.0               | 4.3   |
| Plenoxels [5]         | 6.1         | 8.1              | 10.0          | 5.8          | 6.2              | 6.5               | 11.1        | 6.6               | 7.6   |
| TensoRF-CP [6]        | 22.2        | 21.5             | 21.8          | 18.5         | 29.3             | 22.9              | 24.7        | 19.0              | 22.5  |
| TensoRF-VM [6]        | 18.6        | 15.1             | 18.5          | 13.5         | 23.7             | 18.3              | 19.2        | 14.3              | 17.6  |
| CCNeRF-CP [7]         | 18.9        | 17.2             | 19.2          | 18.9         | 22.8             | 22.5              | 23.0        | 21.7              | 20.5  |
| CCNeRF-HY [7]         | 18.9        | 17.2             | 19.2          | 18.9         | 22.8             | 22.5              | 23.0        | 21.7              | 20.5  |
| Instant-NGP [8]       | 3.2         | 3.1              | 3.8           | 3.8          | 3.0              | 3.5               | 7.4         | 3.0               | 3.9   |
| K-Planes-explicit [9] | 40.7        | 43.6             | 42.2          | 41.5         | 41.2             | 41.6              | 41.5        | 42.5              | 41.9  |
| K-Planes-hybrid [9]   | 40.2        | 43.2             | 41.9          | 41.9         | 41.2             | 41.8              | 41.2        | 42.7              | 41.8  |
| NeRF [10]             | 4.6         | 4.6              | 4.6           | 4.6          | 4.6              | 4.6               | 4.6         | 4.6               | 4.6   |
| Mip-NeRF [11]         | 2.3         | 2.3              | 2.3           | 2.3          | 2.3              | 2.3               | 2.3         | 2.3               | 2.3   |
| Ours-S2               | 0.5         | 0.5              | 0.5           | 0.5          | 0.5              | 0.5               | 0.5         | 0.5               | 0.5   |
| Ours-S4               | 0.9         | 0.9              | 1.0           | 0.9          | 1.0              | 0.9               | 0.9         | 0.9               | 0.9   |
| Ours-S8               | 1.8         | 1.8              | 1.9           | 1.8          | 1.9              | 1.8               | 1.8         | 1.7               | 1.8   |
| Ours-B2               | 1.5         | 1.5              | 1.5           | 1.5          | 1.5              | 1.4               | 1.5         | 1.4               | 1.5   |
| Ours-B4               | 3.0         | 3.0              | 3.0           | 2.9          | 3.1              | 2.8               | 2.9         | 2.8               | 2.9   |
| Ours-B8               | 5.9         | 6.0              | 6.1           | 5.8          | 6.1              | 5.7               | 5.8         | 5.7               | 5.9   |
| PSNR↑                 |             |                  |               |              |                  |                   |             |                   |       |
| DVGO [3, 4]           | 38.15       | 33.80            | 34.39         | 36.31        | 37.52            | 36.54             | 33.10       | 30.28             | 35.01 |
| Plenoxels [5]         | 37.83       | 31.05            | 35.31         | 35.92        | 34.41            | 34.29             | 34.35       | 30.02             | 34.15 |
| TensoRF-CP [6]        | 36.98       | 32.68            | 36.32         | 36.09        | 37.20            | 35.87             | 31.47       | 29.92             | 34.57 |
| TensoRF-VM [6]        | 39.45       | 34.60            | 37.81         | 38.57        | 38.76            | 37.95             | 35.11       | 31.61             | 36.73 |
| CCNeRF-CP [7]         | 34.96       | 30.59            | 32.93         | 32.79        | 33.96            | 34.03             | 28.86       | 27.80             | 31.99 |
| CCNeRF-HY [7]         | 37.25       | 32.42            | 36.23         | 36.30        | 35.95            | 35.63             | 33.69       | 29.08             | 34.57 |
| Instant-NGP [8]       | 37.98       | 27.50            | 37.09         | 37.04        | 27.12            | 29.05             | 36.29       | 32.02             | 33.01 |
| K-Planes-explicit [9] | 36.96       | 18.30            | 37.91         | 35.78        | 20.06            | 35.42             | 34.69       | 30.45             | 31.20 |
| K-Planes-hybrid [9]   | 37.08       | 18.07            | 37.91         | 35.80        | 20.06            | 35.41             | 34.70       | 30.42             | 31.18 |
| NeRF [10]             | 35.72       | 33.45            | 34.74         | 33.52        | 36.52            | 40.89             | 31.60       | 29.23             | 34.46 |
| Mip-NeRF [11]         | 37.33       | 34.08            | 35.03         | 35.16        | 37.21            | 41.59             | 32.20       | 30.04             | 35.33 |
| Ours-S2               | 37.12       | 33.84            | 35.29         | 35.37        | 36.93            | 35.77             | 32.18       | 31.12             | 34.70 |
| Ours-S4               | 38.35       | 34.47            | 36.73         | 37.06        | 37.94            | 36.96             | 33.79       | 31.94             | 35.91 |
| Ours-S8               | 39.14       | 34.89            | 37.80         | 38.16        | 38.48            | 37.53             | 35.09       | 32.47             | 36.69 |
| Ours-B2               | 38.11       | 34.42            | 36.56         | 36.77        | 37.42            | 36.57             | 33.95       | 31.78             | 35.70 |
| Ours-B4               | 38.92       | 34.83            | 37.66         | 37.96        | 38.19            | 37.30             | 35.29       | 32.45             | 36.58 |
| Ours-B8               | 39.39       | 35.16            | 38.46         | 38.52        | 38.56            | 37.63             | 36.22       | 32.77             | 37.09 |

Table 9: Quantitative results of and reconstruction quality (SSIM, LPIPS) on each scene of the Synthetic-NSVF dataset. We highlight the **best score** and **second-best score**.

| Method                | <i>Bike</i>  | <i>Lifestyle</i> | <i>Palace</i> | <i>Robot</i> | <i>Spaceship</i> | <i>Steamtrain</i> | <i>Toad</i>  | <i>Wineholder</i> | Avg.         |
|-----------------------|--------------|------------------|---------------|--------------|------------------|-------------------|--------------|-------------------|--------------|
| SSIM $\uparrow$       |              |                  |               |              |                  |                   |              |                   |              |
| DVGO [3, 4]           | 0.991        | 0.965            | 0.962         | 0.992        | 0.987            | 0.989             | 0.966        | 0.950             | 0.975        |
| Plenoxels [5]         | 0.992        | 0.967            | 0.974         | 0.991        | 0.982            | 0.983             | 0.976        | 0.959             | 0.978        |
| TensoRF-CP [6]        | 0.988        | 0.953            | 0.972         | 0.990        | 0.984            | 0.986             | 0.952        | 0.947             | 0.971        |
| TensoRF-VM [6]        | <b>0.993</b> | 0.969            | 0.981         | 0.994        | <b>0.988</b>     | <b>0.991</b>      | 0.979        | 0.963             | <b>0.982</b> |
| CCNeRF-CP [7]         | 0.980        | 0.936            | 0.938         | 0.978        | 0.973            | 0.975             | 0.904        | 0.920             | 0.950        |
| CCNeRF-HY [7]         | 0.988        | 0.956            | 0.973         | 0.990        | 0.981            | 0.984             | 0.974        | 0.946             | 0.974        |
| Instant-NGP [8]       | 0.986        | 0.955            | 0.976         | 0.990        | 0.966            | 0.976             | <b>0.980</b> | 0.959             | 0.973        |
| K-Planes-explicit [9] | 0.990        | 0.852            | 0.982         | 0.991        | 0.873            | 0.987             | 0.978        | 0.960             | 0.952        |
| K-Planes-hybrid [9]   | 0.990        | 0.850            | <b>0.982</b>  | 0.991        | 0.873            | 0.987             | 0.978        | 0.960             | 0.951        |
| NeRF [10]             | 0.986        | 0.958            | 0.958         | 0.984        | 0.986            | 0.984             | 0.945        | 0.936             | 0.967        |
| Mip-NeRF [11]         | 0.988        | 0.961            | 0.962         | 0.988        | 0.987            | 0.987             | 0.954        | 0.946             | 0.971        |
| Ours-S2               | 0.988        | 0.960            | 0.964         | 0.989        | 0.984            | 0.984             | 0.958        | 0.955             | 0.973        |
| Ours-S4               | 0.991        | 0.965            | 0.974         | 0.993        | 0.987            | 0.988             | 0.970        | 0.963             | 0.979        |
| Ours-S8               | 0.992        | 0.968            | 0.979         | 0.994        | 0.988            | 0.990             | 0.978        | <b>0.967</b>      | 0.982        |
| Ours-B2               | 0.990        | 0.965            | 0.973         | 0.992        | 0.985            | 0.987             | 0.972        | 0.961             | 0.978        |
| Ours-B4               | 0.992        | 0.968            | 0.979         | 0.994        | 0.987            | 0.989             | 0.979        | 0.966             | 0.982        |
| Ours-B8               | <b>0.992</b> | <b>0.970</b>     | <b>0.983</b>  | <b>0.994</b> | <b>0.988</b>     | <b>0.990</b>      | <b>0.983</b> | <b>0.969</b>      | <b>0.984</b> |
| LPIPS $\downarrow$    |              |                  |               |              |                  |                   |              |                   |              |
| DVGO [3, 4]           | 0.011        | 0.053            | 0.043         | 0.013        | 0.020            | 0.018             | 0.045        | 0.055             | 0.032        |
| Plenoxels [5]         | 0.011        | 0.047            | 0.026         | 0.013        | 0.025            | 0.028             | 0.031        | 0.046             | 0.028        |
| TensoRF-CP [6]        | 0.022        | 0.080            | 0.029         | 0.016        | 0.028            | 0.031             | 0.065        | 0.080             | 0.044        |
| TensoRF-VM [6]        | 0.010        | 0.046            | 0.020         | 0.010        | 0.020            | 0.017             | 0.028        | 0.047             | 0.025        |
| CCNeRF-CP [7]         | 0.032        | 0.101            | 0.069         | 0.032        | 0.039            | 0.049             | 0.101        | 0.105             | 0.066        |
| CCNeRF-HY [7]         | 0.020        | 0.073            | 0.029         | 0.015        | 0.031            | 0.031             | 0.037        | 0.075             | 0.039        |
| Instant-NGP [8]       | 0.013        | 0.051            | 0.018         | 0.009        | 0.039            | 0.026             | <b>0.020</b> | 0.038             | 0.027        |
| K-Planes-explicit [9] | 0.011        | 0.223            | 0.021         | 0.012        | 0.175            | 0.017             | 0.027        | 0.041             | 0.066        |
| K-Planes-hybrid [9]   | 0.012        | 0.219            | 0.022         | 0.012        | 0.177            | 0.016             | 0.027        | 0.041             | 0.066        |
| NeRF [10]             | 0.021        | 0.067            | 0.045         | 0.023        | 0.023            | 0.031             | 0.066        | 0.075             | 0.044        |
| Mip-NeRF [11]         | 0.019        | 0.063            | 0.041         | 0.018        | 0.022            | 0.027             | 0.059        | 0.066             | 0.039        |
| Ours-S2               | 0.016        | 0.053            | 0.030         | 0.014        | 0.022            | 0.025             | 0.045        | 0.049             | 0.032        |
| Ours-S4               | 0.012        | 0.045            | 0.020         | 0.008        | 0.018            | 0.017             | 0.031        | 0.040             | 0.024        |
| Ours-S8               | <b>0.010</b> | 0.040            | 0.015         | <b>0.007</b> | <b>0.016</b>     | <b>0.014</b>      | 0.023        | <b>0.035</b>      | 0.020        |
| Ours-B2               | 0.013        | 0.044            | 0.020         | 0.010        | 0.021            | 0.020             | 0.029        | 0.043             | 0.025        |
| Ours-B4               | 0.010        | <b>0.038</b>     | <b>0.015</b>  | 0.007        | 0.018            | 0.015             | 0.021        | 0.036             | <b>0.020</b> |
| Ours-B8               | <b>0.009</b> | <b>0.035</b>     | <b>0.012</b>  | <b>0.006</b> | <b>0.016</b>     | <b>0.013</b>      | <b>0.017</b> | <b>0.032</b>      | <b>0.017</b> |



Table 10: Quantitative results of storage size and reconstruction quality (PSNR) on each scene of the Tanks and Temples dataset. We highlight the **best score** and **second-best score**.

| Method                | <i>Barn</i> | <i>Caterpillar</i> | <i>Family</i> | <i>Ignatius</i> | <i>Truck</i> | Avg.  |
|-----------------------|-------------|--------------------|---------------|-----------------|--------------|-------|
| Size (MB)↓            |             |                    |               |                 |              |       |
| DVGO [3, 4]           | 9.2         | 7.6                | 6.3           | 5.5             | 7.3          | 7.2   |
| Plenoxels [5]         | 14.7        | 10.7               | 9.3           | 8.5             | 12.3         | 11.1  |
| TensoRF-CP [6]        | 37.7        | 33.0               | 28.5          | 31.8            | 33.8         | 33.0  |
| TensoRF-VM [6]        | 29.1        | 26.6               | 23.7          | 23.4            | 28.5         | 26.3  |
| CCNeRF-CP [7]         | 33.8        | 29.0               | 23.5          | 18.7            | 23.1         | 25.6  |
| CCNeRF-HY [7]         | 33.8        | 29.0               | 23.5          | 18.7            | 23.1         | 25.6  |
| Instant-NGP [8]       | 3.7         | 3.6                | 3.4           | 3.3             | 3.7          | 3.5   |
| K-Planes-explicit [9] | 40.2        | 39.8               | 35.9          | 37.3            | 39.2         | 38.5  |
| K-Planes-hybrid [9]   | 43.7        | 42.3               | 38.3          | 39.7            | 41.5         | 41.1  |
| NeRF [10]             | 4.6         | 4.6                | 4.6           | 4.6             | 4.6          | 4.6   |
| Mip-NeRF [11]         | 2.3         | 2.3                | 2.3           | 2.3             | 2.3          | 2.3   |
| Ours-S2               | 0.5         | 0.5                | 0.5           | 0.5             | 0.5          | 0.5   |
| Ours-S4               | 1.0         | 1.0                | 0.9           | 1.0             | 1.0          | 1.0   |
| Ours-S8               | 1.9         | 1.9                | 1.8           | 1.9             | 1.8          | 1.9   |
| Ours-B2               | 1.6         | 1.6                | 1.5           | 1.6             | 1.6          | 1.6   |
| Ours-B4               | 3.1         | 3.1                | 2.9           | 3.2             | 3.1          | 3.1   |
| Ours-B8               | 6.1         | 6.0                | 5.8           | 6.3             | 6.0          | 6.0   |
| PSNR↑                 |             |                    |               |                 |              |       |
| DVGO [3, 4]           | 26.94       | 25.76              | 33.73         | 28.23           | 27.14        | 28.36 |
| Plenoxels [5]         | 24.50       | 25.27              | 30.01         | 27.87           | 26.69        | 26.87 |
| TensoRF-CP [6]        | 27.03       | 25.27              | 32.78         | 28.27           | 26.30        | 27.93 |
| TensoRF-VM [6]        | 27.50       | 26.30              | 34.16         | 28.38           | 26.92        | 28.65 |
| CCNeRF-CP [7]         | 25.19       | 23.41              | 30.59         | 27.09           | 24.95        | 26.25 |
| CCNeRF-HY [7]         | 26.41       | 24.78              | 32.75         | 27.81           | 26.37        | 27.62 |
| Instant-NGP [8]       | 26.10       | 25.76              | 32.48         | 26.80           | 27.46        | 27.72 |
| K-Planes-explicit [9] | 27.39       | 25.37              | 33.38         | 26.99           | 26.94        | 28.01 |
| K-Planes-hybrid [9]   | 27.32       | 25.52              | 33.39         | 26.98           | 26.84        | 28.01 |
| NeRF [10]             | 27.27       | 25.32              | 31.56         | 27.29           | 26.47        | 27.58 |
| Mip-NeRF [11]         | 27.45       | 25.41              | 32.38         | 27.57           | 26.05        | 27.77 |
| Ours-S2               | 27.35       | 25.70              | 33.38         | 27.83           | 26.96        | 28.24 |
| Ours-S4               | 27.61       | 25.86              | 33.90         | 27.82           | 27.29        | 28.50 |
| Ours-S8               | 27.69       | 25.95              | 34.33         | 27.93           | 27.47        | 28.67 |
| Ours-B2               | 27.65       | 25.87              | 33.86         | 27.78           | 27.31        | 28.49 |
| Ours-B4               | 27.74       | 25.97              | 34.33         | 27.92           | 27.46        | 28.68 |
| Ours-B8               | 27.69       | 26.00              | 34.45         | 27.92           | 27.54        | 28.72 |

Table 11: Quantitative results of reconstruction quality (SSIM, LPIPS) on each scene of the Tanks and Temples dataset. We highlight the **best score** and **second-best score**.

| Method                | <i>Barn</i> | <i>Caterpillar</i> | <i>Family</i> | <i>Ignatius</i> | <i>Truck</i> | Avg.  |
|-----------------------|-------------|--------------------|---------------|-----------------|--------------|-------|
| SSIM↑                 |             |                    |               |                 |              |       |
| DVGO [3, 4]           | 0.839       | 0.905              | 0.962         | 0.943           | 0.906        | 0.911 |
| Plenoxels [5]         | 0.842       | 0.905              | 0.959         | 0.942           | 0.910        | 0.912 |
| TensoRF-CP [6]        | 0.845       | 0.884              | 0.951         | 0.939           | 0.887        | 0.901 |
| TensoRF-VM [6]        | 0.866       | 0.913              | 0.967         | 0.949           | 0.913        | 0.922 |
| CCNeRF-CP [7]         | 0.794       | 0.859              | 0.931         | 0.924           | 0.858        | 0.873 |
| CCNeRF-HY [7]         | 0.828       | 0.887              | 0.957         | 0.938           | 0.895        | 0.901 |
| Instant-NGP [8]       | 0.862       | 0.920              | 0.968         | 0.953           | 0.929        | 0.926 |
| K-Planes-explicit [9] | 0.876       | 0.909              | 0.963         | 0.938           | 0.917        | 0.921 |
| K-Planes-hybrid [9]   | 0.872       | 0.912              | 0.963         | 0.940           | 0.917        | 0.921 |
| NeRF [10]             | 0.845       | 0.893              | 0.943         | 0.935           | 0.893        | 0.902 |
| Mip-NeRF [11]         | 0.846       | 0.888              | 0.947         | 0.933           | 0.890        | 0.901 |
| Ours-S2               | 0.853       | 0.898              | 0.956         | 0.941           | 0.897        | 0.909 |
| Ours-S4               | 0.864       | 0.904              | 0.962         | 0.944           | 0.908        | 0.916 |
| Ours-S8               | 0.872       | 0.907              | 0.965         | 0.945           | 0.913        | 0.920 |
| Ours-B2               | 0.869       | 0.904              | 0.963         | 0.944           | 0.907        | 0.917 |
| Ours-B4               | 0.877       | 0.909              | 0.966         | 0.946           | 0.914        | 0.922 |
| Ours-B8               | 0.882       | 0.910              | 0.968         | 0.947           | 0.917        | 0.925 |
| LPIPS↓                |             |                    |               |                 |              |       |
| DVGO [3, 4]           | 0.291       | 0.168              | 0.070         | 0.086           | 0.159        | 0.155 |
| Plenoxels [5]         | 0.276       | 0.162              | 0.076         | 0.094           | 0.151        | 0.152 |
| TensoRF-CP [6]        | 0.275       | 0.212              | 0.081         | 0.092           | 0.199        | 0.172 |
| TensoRF-VM [6]        | 0.248       | 0.157              | 0.059         | 0.077           | 0.147        | 0.138 |
| CCNeRF-CP [7]         | 0.371       | 0.263              | 0.108         | 0.117           | 0.237        | 0.219 |
| CCNeRF-HY [7]         | 0.306       | 0.214              | 0.076         | 0.100           | 0.184        | 0.176 |
| Instant-NGP [8]       | 0.210       | 0.118              | 0.040         | 0.056           | 0.106        | 0.106 |
| K-Planes-explicit [9] | 0.196       | 0.138              | 0.065         | 0.107           | 0.126        | 0.126 |
| K-Planes-hybrid [9]   | 0.199       | 0.133              | 0.059         | 0.103           | 0.125        | 0.124 |
| NeRF [10]             | 0.282       | 0.189              | 0.100         | 0.098           | 0.185        | 0.171 |
| Mip-NeRF [11]         | 0.281       | 0.194              | 0.093         | 0.101           | 0.184        | 0.171 |
| Ours-S2               | 0.220       | 0.154              | 0.062         | 0.079           | 0.153        | 0.134 |
| Ours-S4               | 0.204       | 0.145              | 0.054         | 0.075           | 0.138        | 0.123 |
| Ours-S8               | 0.192       | 0.138              | 0.048         | 0.074           | 0.128        | 0.116 |
| Ours-B2               | 0.198       | 0.144              | 0.052         | 0.075           | 0.139        | 0.122 |
| Ours-B4               | 0.187       | 0.136              | 0.046         | 0.072           | 0.128        | 0.114 |
| Ours-B8               | 0.180       | 0.133              | 0.043         | 0.072           | 0.121        | 0.109 |

## References

- [1] Chenxi Lola Deng and Enzo Tartaglione. Compressing explicit voxel grid representations: fast nerfs become also small. In *Proceedings of the IEEE/CVF Winter Conference on Applications of Computer Vision*, pages 1236–1245, 2023.
- [2] Lingzhi Li, Zhen Shen, Zhongshu Wang, Li Shen, and Liefeng Bo. Compressing volumetric radiance fields to 1 mb. *arXiv preprint arXiv:2211.16386*, 2022.
- [3] Cheng Sun, Min Sun, and Hwann-Tzong Chen. Direct voxel grid optimization: Super-fast convergence for radiance fields reconstruction. In *Proceedings of the IEEE/CVF Conference on Computer Vision and Pattern Recognition*, pages 5459–5469, 2022.
- [4] Cheng Sun, Min Sun, and Hwann-Tzong Chen. Improved direct voxel grid optimization for radiance fields reconstruction. *arXiv preprint arXiv:2206.05085*, 2022.
- [5] Sara Fridovich-Keil, Alex Yu, Matthew Tancik, Qinhong Chen, Benjamin Recht, and Angjoo Kanazawa. Plenoxels: Radiance fields without neural networks. In *Proceedings of the IEEE/CVF Conference on Computer Vision and Pattern Recognition*, pages 5501–5510, 2022.
- [6] Anpei Chen, Zexiang Xu, Andreas Geiger, Jingyi Yu, and Hao Su. Tensorf: Tensorial radiance fields. In *Computer Vision–ECCV 2022: 17th European Conference, Tel Aviv, Israel, October 23–27, 2022, Proceedings, Part XXXII*, pages 333–350. Springer, 2022.
- [7] Jiaxiang Tang, Xiaokang Chen, Jingbo Wang, and Gang Zeng. Compressible-composable nerf via rank-residual decomposition. *arXiv preprint arXiv:2205.14870*, 2022.
- [8] Thomas Müller, Alex Evans, Christoph Schied, and Alexander Keller. Instant neural graphics primitives with a multiresolution hash encoding. *ACM Transactions on Graphics (ToG)*, 41(4):1–15, 2022.
- [9] Sara Fridovich-Keil, Giacomo Meanti, Frederik Warburg, Benjamin Recht, and Angjoo Kanazawa. K-planes: Explicit radiance fields in space, time, and appearance. *arXiv preprint arXiv:2301.10241*, 2023.
- [10] Ben Mildenhall, Pratul P Srinivasan, Matthew Tancik, Jonathan T Barron, Ravi Ramamoorthi, and Ren Ng. Nerf: Representing scenes as neural radiance fields for view synthesis. *Communications of the ACM*, 65(1):99–106, 2021.
- [11] Jonathan T Barron, Ben Mildenhall, Matthew Tancik, Peter Hedman, Ricardo Martin-Brualla, and Pratul P Srinivasan. Mip-nerf: A multiscale representation for anti-aliasing neural radiance fields. In *Proceedings of the IEEE/CVF International Conference on Computer Vision*, pages 5855–5864, 2021.
- [12] Daniel Rho, Byeonghyeon Lee, Seungtae Nam, Joo Chan Lee, Jong Hwan Ko, and Eunbyung Park. Masked wavelet representation for compact neural radiance fields. In *Proceedings of the IEEE/CVF Conference on Computer Vision and Pattern Recognition*, pages 20680–20690, 2023.
- [13] Jiemin Fang, Taoran Yi, Xinggang Wang, Lingxi Xie, Xiaopeng Zhang, Wenyu Liu, Matthias Nießner, and Qi Tian. Fast dynamic radiance fields with time-aware neural voxels. In *SIGGRAPH Asia 2022 Conference Papers*, pages 1–9, 2022.
- [14] Bernhard Kerbl, Georgios Kopanas, Thomas Leimkühler, and George Drettakis. 3d gaussian splatting for real-time radiance field rendering. *ACM Transactions on Graphics*, 42(4), 2023.
- [15] Joo Chan Lee, Daniel Rho, Xiangyu Sun, Jong Hwan Ko, and Eunbyung Park. Compact 3d gaussian representation for radiance field. *arXiv preprint arXiv:2311.13681*, 2023.
